# Supplementary material for: Identification and characterization of DNA sequences that prevent glucocorticoid receptor binding to nearby response elements
Source: PubMed Central journal article supplement — Nucleic Acids Res. 2016 Mar 25;44(13):6142–56. doi: 10.1093/nar/gkw203 (PMC5291246; doi:10.1093/nar/gkw203), 2016-03-25
Supplement: supp_gkw203_nar-03287-m-2015-File002.pdf [file supp_gkw203_nar-03287-m-2015-File002.pdf]

## Supplementary Figures and Tables

### Identification and characterization of DNA sequences that prevent glucocorticoid receptor binding to nearby response elements

Jonas Telorac<sup>1</sup>, Sergey V. Prykhozhiy<sup>1,2</sup>, Stefanie Schöne<sup>1</sup>, David Meierhofer<sup>1</sup>, Sascha Sauer<sup>3</sup>, Morgane Thomas-Chollier<sup>4#</sup>, Sebastiaan H. Meijnsing<sup>1#</sup>

<sup>1</sup> Max Planck Institute for Molecular Genetics, Ihnestrasse 63-73, D-14195, Berlin, Germany.

<sup>2</sup> Dalhousie University, Halifax, Canada.

<sup>3</sup> CU Systems Medicine, University of Würzburg, Josef-Schneider-Strasse 2, D-97080 Würzburg, Germany.

<sup>4</sup> Computational Systems Biology, Institut de Biologie de l'Ecole Normale Supérieure (IBENS), CNRS, Inserm, Ecole Normale Supérieure, PSL Research University, F-75005 Paris, France

# To whom correspondence should be addressed:

Sebastiaan H. Meijnsing  
Max Planck Institute for Molecular Genetics,  
Ihnestrasse 63-73  
14195, Berlin, Germany  
Tel: +49-30-84131176  
Email: meijnsing@molgen.mpg.de

Morgane Thomas-Chollier  
Institut de Biologie de l'Ecole Normale Supérieure  
46 rue d'Ulm  
75230, Paris, France  
Email: mthomas@biologie.ens.fr

Additional footnotes:

# co-corresponding author

**This PDF includes:**

- **Supplemental Figures**
- **Supplemental Tables**

Supplemental figures:

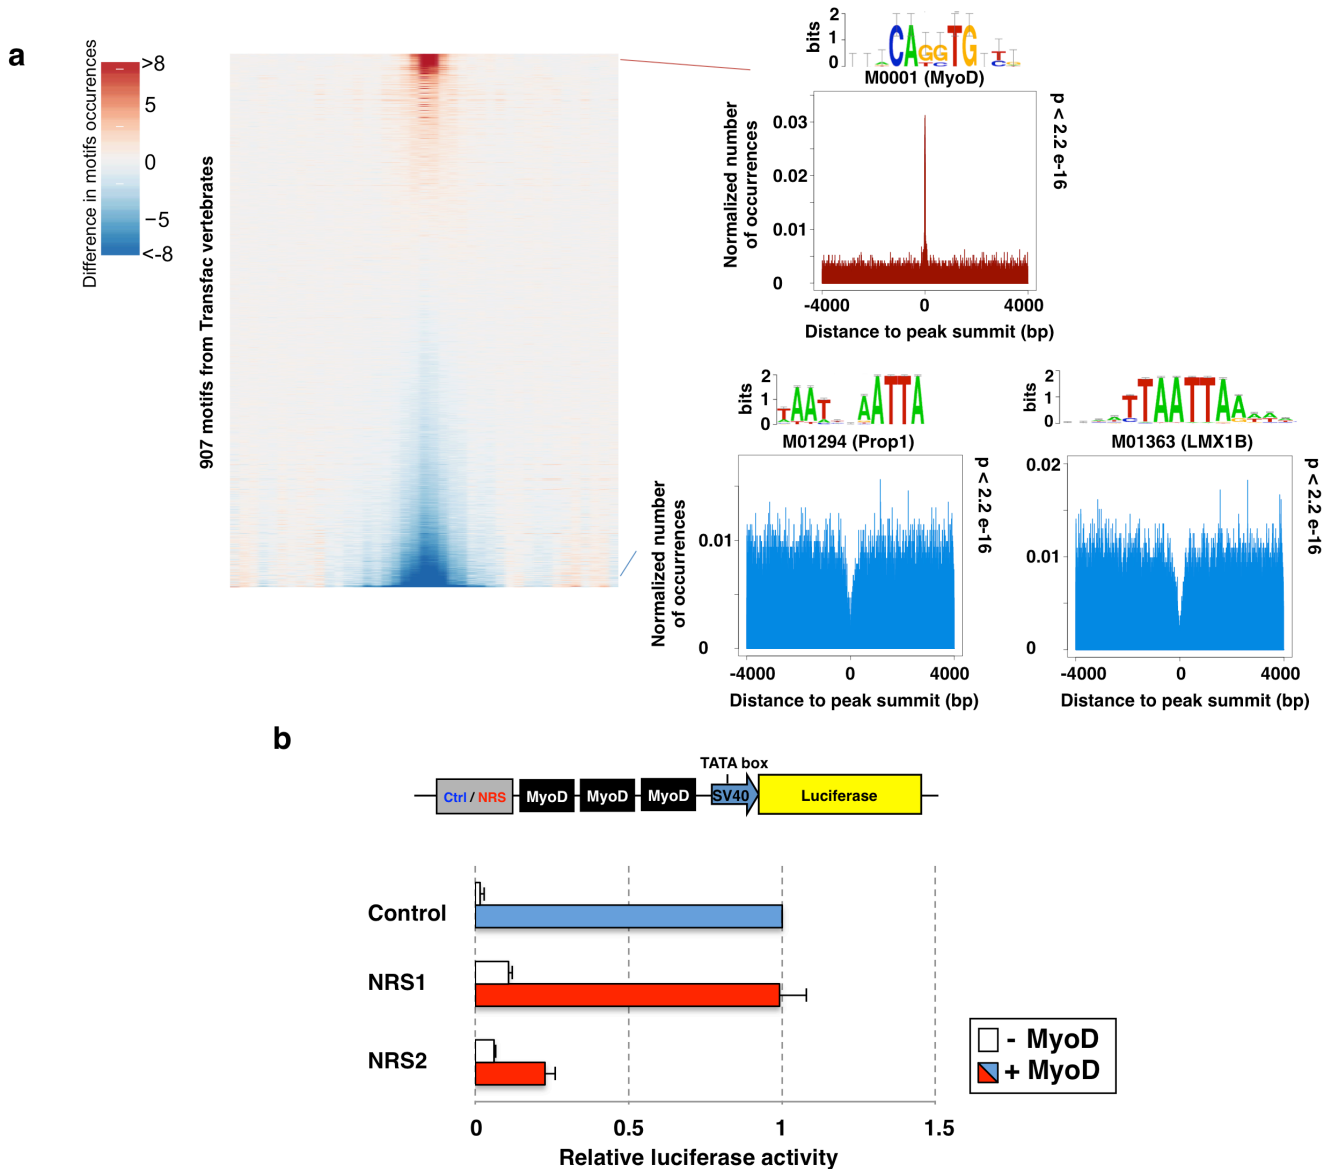

**Figure S1.** Motif occurrence and functional analysis of depleted sequences around MyoD-bound regions. (a) Occurrence of motif around MyoD-bound regions was analyzed as described for Fig. 1a. (b) Cells were transfected with luciferase reporter constructs with 3 MyoD binding sites, flanked by a single NRS or control sequence as indicated. Along with reporter, U2OS cells were transfected with either an empty, or a MyoD-encoding expression construct. Reporter activity, normalized to control reporter + MyoD, is shown  $\pm$ SEM (n=3).

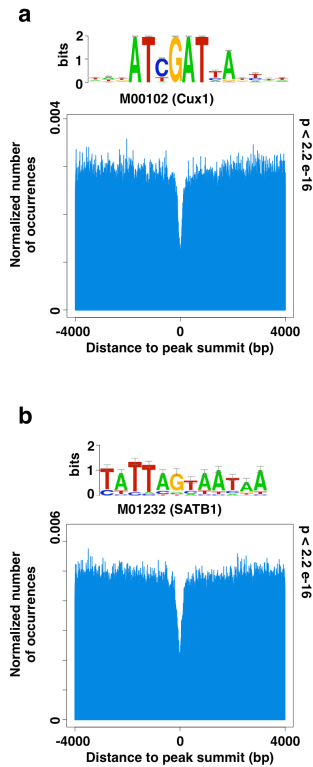

**Figure S2.** Depletion of NRS sequences identified in previous studies. DNA sequences from GR ChIP-Seq peaks in U2OS cells stably expressing GR were aligned at the peak summit and flanking genomic DNA +/- 4000 bp was sub-divided into 50 bp bins. For each bin, the relative frequency distribution of sequence motifs for (a) Cux1 (M00102) and (b) SATB1 (M01232) was determined by scanning for alignment to these motifs. The normalized number of occurrences for each motif per bin is shown.

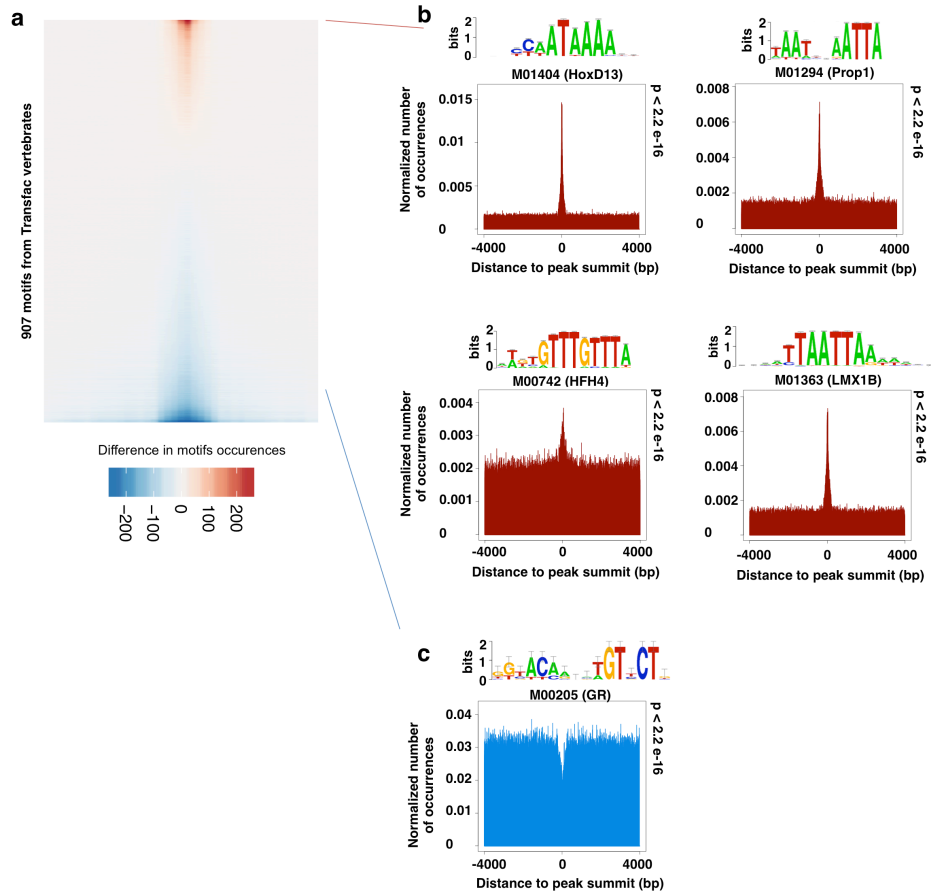

**Figure S3.** Analysis of motif occurrence around HoxD13-bound regions. (a) Occurrence of motif around HoxD13-bound regions was analyzed as described for Fig. 1a. Examples of motifs that are either (b) enriched, or (c) depleted around the peak summit of HoxD13-bound regions.

Table S1: Oligos used for cloning.

**Transient NRS-GBS reporters (Fig. 2a, 2b, 2c)**

GBS (FKBP5):

CCGGAGAACAGGGTGTCT

GATCAGAACACCCTGTCT

Control:

GTACGCAAGCCTACCTCG

CTAGCGAGGTAGGCTTGC

NRS1:

GTACGAGGTTAATTAACG

CTAGCGTTAATTAACCTC

Control +5:

GTACGCGAGGTAGGCTTGGCTGA

CTAGTCAGCCAAGCCTACCTCGC

NRS1 +5:

GTACGAGAGGTTAATTAAGCTGA

CTAGTCAGCTTAATTAACCTCTC

AAAATT:

GTACGAGGAAAAATTGCG

CTAGCGCAATTTTTTCCTC

AAAAAAA:

GTACGAGGAAAAAAAACG

CTAGCGTTTTTTTTTCCTC

TTTTTAA:

GTACGAGGTTTTTAAGCG

CTAGCGCTTAAAAACCTC

TATATATA:

GTACGAGGTATATATACG

CTAGCGTATATATACCTC

Control +10:

GTACAGAGGTAGGCTTGGAGCTGCTGACTAGCCCGGAGAACAGGGTGTCT

GATCAGAACACCCTGTTCTCCGGGCTAGTCAGCAGCTCCAAGCCTACCTCT

NRS2 +10:

GTACTTAATTCAATTAAGAGCTGCTGACTAGCCCGGAGAACAGGGTGTCT

GATCAGAACACCCTGTTCTCCGGGCTAGTCAGCAGCTCTTAATTGAATTAA

Control +20:

GTACAGAGGTAGGCTTGCAGTTGGCGAGAGCTGCTGACTAGCCCGGAGAACAGGGTGTCT

GATCAGAACACCCTGTTCTCCGGGCTAGTCAGCAGCTCTCGCCAACTGCAAGCCTACCTCT

NRS2 +20:

GTACTTAATTCAATTAACAGTTGGCGAGAGCTGCTGACTAGCCCGGAGAACAGGGTGTCT

GATCAGAACACCCTGTTCTCCGGGCTAGTCAGCAGCTCTCGCCAACTGTTAATTGAATTAA

Control #2:

GTACGAGGTTTGTGTTGCG

CTAGCGCAAACAAACCTC

NRS2:

GTACGTTAATTCAATTAA

CTAGTTAATTGAATTAAC

Control #2 +5:

GTACGAGAGGTTTGTGTTGCTGA

CTAGTCAGCCAACAAACCTCTC

NRS2 +5:

GTACGTTAATTCAATTAAGCTGA

CTAGTCAGCTTAATTGAATTAAC

AAAAAAA:

GTACGAGGTTTTTTTTGCG

CTAGCGCAAAAAACCTC

AAAATTTT:

GTACGAGGAAAATTTTCG

CTAGCGAAAATTTTCCTC

ATTTTTA:

GTACGAGGATTTTTAGCG

CTAGCGCTAAAAATCCTC

TTTTAAAA:

GTACGAGGTTTTAAAACG

CTAGCGTTTTAAAACCTC

### **Integrated NRS-GBS reporters (Fig. 3b)**

GBS (FKBP5):

CCGGAGAACAGGGTGTCT

GATCAGAACACCCTGTCT

Control:

GTACGAGGTAGGCTTG

CTAGCAAGCCTACCTC

NRS1:

GTACGAGGTTAATTAA

CTAGTTAATTAACCTC

Control #2:

GTACGAGGTTTGTTTG

CTAGCAAACAAACCTC

NRS2:

GTATTAATTCAATTAA

CTAGTTAATTGAATTAA

JT163: CCAGGTCTCAGTACCGTGCCAGAACATTTCTCTATCGATA

JT164: CCAGGTCTCATCGACGGATCCTTATCGATTTTACC

### **6 GBS-NRS-TagRFP reporters (Fig. 4a)**

6 GBS (PacI-cons-fkbp5-tat-fkbp5-cons-tat-AscI):

ggaattaattaaAGAACAaaaTGTACCAGAACAgggTGTCTAGAACAtcccTGTACAAGAACAgggTGT

TCTAGAACAAAATGTACCAGAACAtcccTGTACAggcgcgccttcc

Control:

CGCGCAAGCCTACCTCGGCCAAGCCTACCTCG

CGCGCGAGGTAGGCTTGGCCGAGGTAGGCTTG

Control #2:

CGCGCAAACAAACCTCGGCCAAACAAACCTCG

CGCGCGAGGTTTGTTTGGCCGAGGTTTGTTTG

NRS1:

CGCGTTAATTAACCTCGGCTTAATTAACCTCG

CGCGCGAGGTTAATTAAGCCGAGGTTAATTAA

NRS2:

CGCGTTAATTGAATTAAGCTTAATTGAATTAA

CGCGTTAATTCAATTAAGCTTAATTCAATTAA

### **NRS-3MyoD constructs (Fig. 7)**

Control:

CTAGCGAGGTAGGCTTGGGGCAGCTGCTGAAGGGCAGCTGCTGAAGGGCAGCTGCTGTGCA

CAGCAGCTGCCCTTCAGCAGCTGCCCTTCAGCAGCTGCCCAAGCCTACCTCG

Control #2:

CTAGAGAGGTTTGTTTGGGGCAGCTGCTGAAGGGCAGCTGCTGAAGGGCAGCTGCTGTGCA

CAGCAGCTGCCCTTCAGCAGCTGCCCTTCAGCAGCTGCCCAACAAACCTCT

NRS1:

CTAGAGAGGTTAATTAAGGGCAGCTGCTGAAGGGCAGCTGCTGAAGGGCAGCTGCTGTGCA

CAGCAGCTGCCCTTCAGCAGCTGCCCTTCAGCAGCTGCCCTTAATTAACCTCT

NRS2:

CTAGTTAATTCAATTAAGGGCAGCTGCTGAAGGGCAGCTGCTGAAGGGCAGCTGCTGTGCA

CAGCAGCTGCCCTTCAGCAGCTGCCCTTCAGCAGCTGCCCTTAATTGAATTAA

Table S2: Primers used for qPCR analysis.

| <b>Gene/Locus:</b>  | <b>Fw primer:</b>      | <b>Rev. Primer:</b>    |
|---------------------|------------------------|------------------------|
| <i>hFKBP5</i>       | GCATGGTTTAGGGGTTCTTG   | TAACCACATCAAGCGAGCTG   |
| <i>hRPL19</i>       | ATGTATCACAGCCTGTACCTG  | TTCTTGGTCTCTTCCTCCTTG  |
| Integr. GBS         | GCAGATCGCAGATCAGAACA   | TATGGTACCGTGCCAGAACA   |
| <i>hIGFBP1</i>      | ACGTCCTGGATACAGTATGTGC | TCATGTTCTTAGGGGGCAAC   |
| <i>hGAPDH</i> -TSS  | AAAAGCGGGGAGAAAGTAGG   | GGTCTTGAGGCCTGAGCTAC   |
| <i>hGAPDH</i> +1nuc | CCCCGGTTTCTATAAATTGAGC | AAAGAAGATGCGGCTGACTG   |
| <i>hNONO</i>        | ACAGCAGGAAGGATTCAAGG   | GCATGGCACCTCTGTTGTT    |
| <i>hSFPQ</i>        | GAGGAGAAGATCTCGGACTCG  | CGACATCGCTGTGTGTAAGTTT |
| <i>ECFP</i>         | ACGTAAACGGCCACAAGTTC   | GCAGATGAACTTCAGGGTCAG  |
| <i>zFKBP5</i>       | CAAAGGGGGAATGCTGTT     | TTCTTTTCTGCCCTCTTTGC   |
| <i>TagRFP</i>       | GCTGGGAGGCCAACACCGAG   | CAGGGCCATGTCGCTTCTGC   |

h: human

z: zebrafish

Table S3: Identification of NRS-associated proteins by affinity purification and subsequent mass spectrometry analysis. Shown are only proteins with a ratios >2 between NRS experiments versus controls and identified in at least two out of 3 experiments for one or both of the NRS sequences. Amount of unique peptides, sequence coverage in % and a posterior error probability of the identifications are shown.

| Protein name:                                     | Gene:  | NRS1/control ratio >2 | NRS2/control ratio >2 | Unique peptides | Sequence coverage [%] | PEP       |
|---------------------------------------------------|--------|-----------------------|-----------------------|-----------------|-----------------------|-----------|
| Splicing factor, proline- and glutamine-rich      | SFPQ   | 3                     | 2                     | 29              | 43.6                  | 0         |
| Non-POU domain-containing octamer-binding protein | NONO   | 3                     | 3                     | 20              | 49.3                  | 0         |
| DNA-3-methyladenine glycosylase                   | MPG    | 2                     | 3                     | 14              | 63.3                  | 1.55E-139 |
| RNA-binding protein 14                            | RBM14  | 2                     | 2                     | 18              | 29.1                  | 5.07E-80  |
| Heterogeneous nuclear ribonucleoprotein D-like    | HNRPDL | 2                     | 2                     | 7               | 39.3                  | 1.01E-92  |
| 60S ribosomal protein L4                          | RPL4   | 2                     | 1                     | 12              | 34.9                  | 2.78E-75  |
| ATP-dependent RNA helicase A                      | DHX9   | 2                     | 1                     | 28              | 28.4                  | 6.89E-118 |
| Nucleolin                                         | NCL    | 2                     | 0                     | 21              | 30.8                  | 7.79E-193 |
| 60S ribosomal protein L31                         | RPL31  | 2                     | 0                     | 3               | 26.4                  | 5.97E-31  |
| THO complex subunit 4                             | ALYREF | 1                     | 2                     | 2               | 48.6                  | 0         |
| PC4 and SFRS1-interacting protein                 | PSIP1  | 1                     | 2                     | 13              | 24.5                  | 5.95E-112 |
